# Supplementary material
Source: PubMed Central journal article supplement (PMC5192102)
Supplement: AAC.00952-16_zac001175791s1.pdf [file AAC.00952-16_zac001175791s1.pdf]

1 **Supplementary material:** Wittau M. et al., "Population Pharmacokinetics and Target  
2 Attainment of Ertapenem in Plasma and Tissue Assessed via Microdialysis in Morbidly  
3 Obese Patients after Laparoscopic Visceral Surgery"  
4

5 **Figure S1:** Visual predictive checks for ertapenem concentrations in plasma (unbound  
6 and total drug), and unbound ertapenem in subcutaneous tissue and  
7 peritoneal fluid after 1,000 mg ertapenem dosed as 15 min infusions at 0 and  
8 26 h. The markers are observed concentrations; the median represents the  
9 central tendency of the model predicted concentrations; the 25<sup>th</sup> to 75<sup>th</sup>  
10 percentile lines show the interquartile range of the predictions and the 10<sup>th</sup> to  
11 90<sup>th</sup> percentiles represent the 80% prediction interval. Ideally, the median  
12 should reflect the central tendency of the observations and 10% of the  
13 observations should fall outside of the 80% prediction interval on either side.  
14

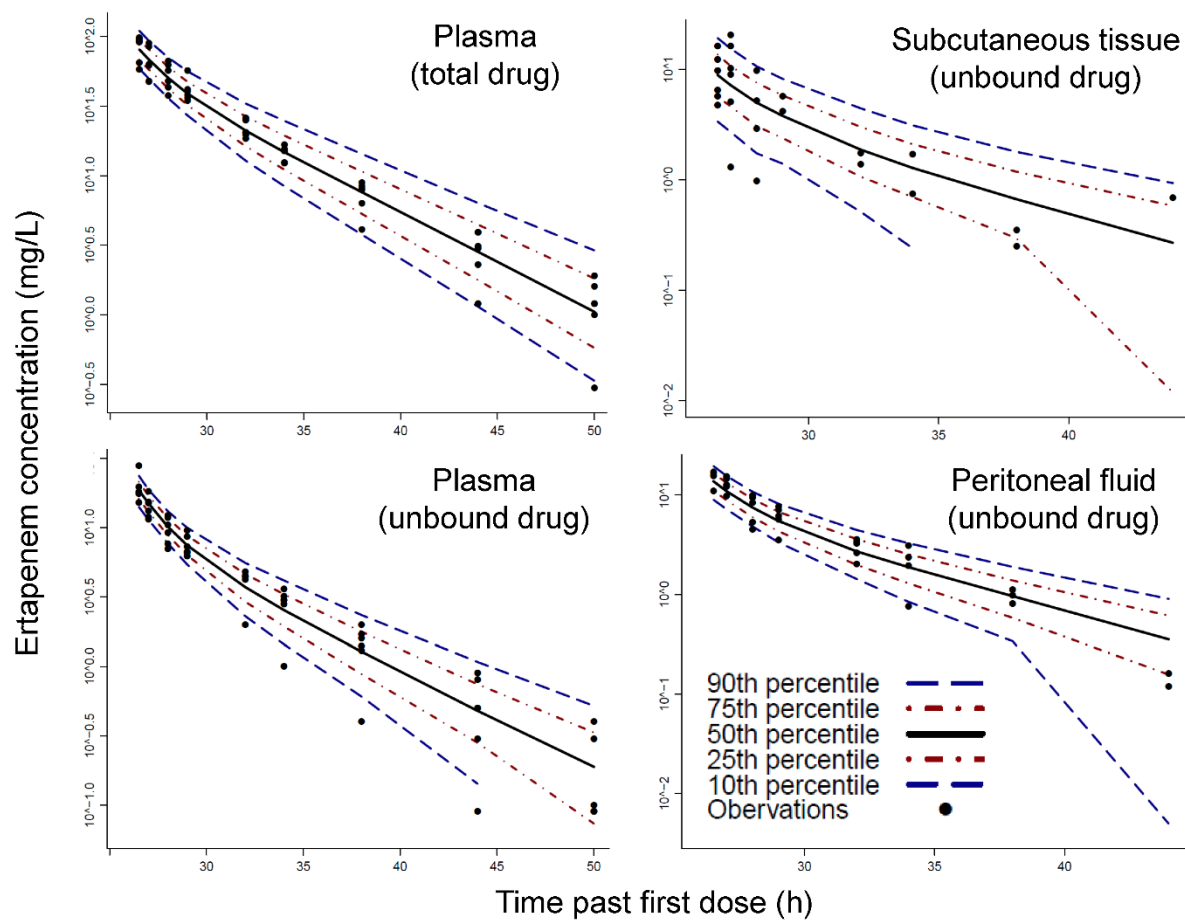

15

16 **Figure S2:** Observed vs. individual fitted ertapenem concentrations in plasma (unbound  
17 and total drug), and unbound ertapenem in subcutaneous tissue and  
18 peritoneal fluid. The green line represents the line of identity and the dashed  
19 blue line a LOESS smoother through the observations.  
20

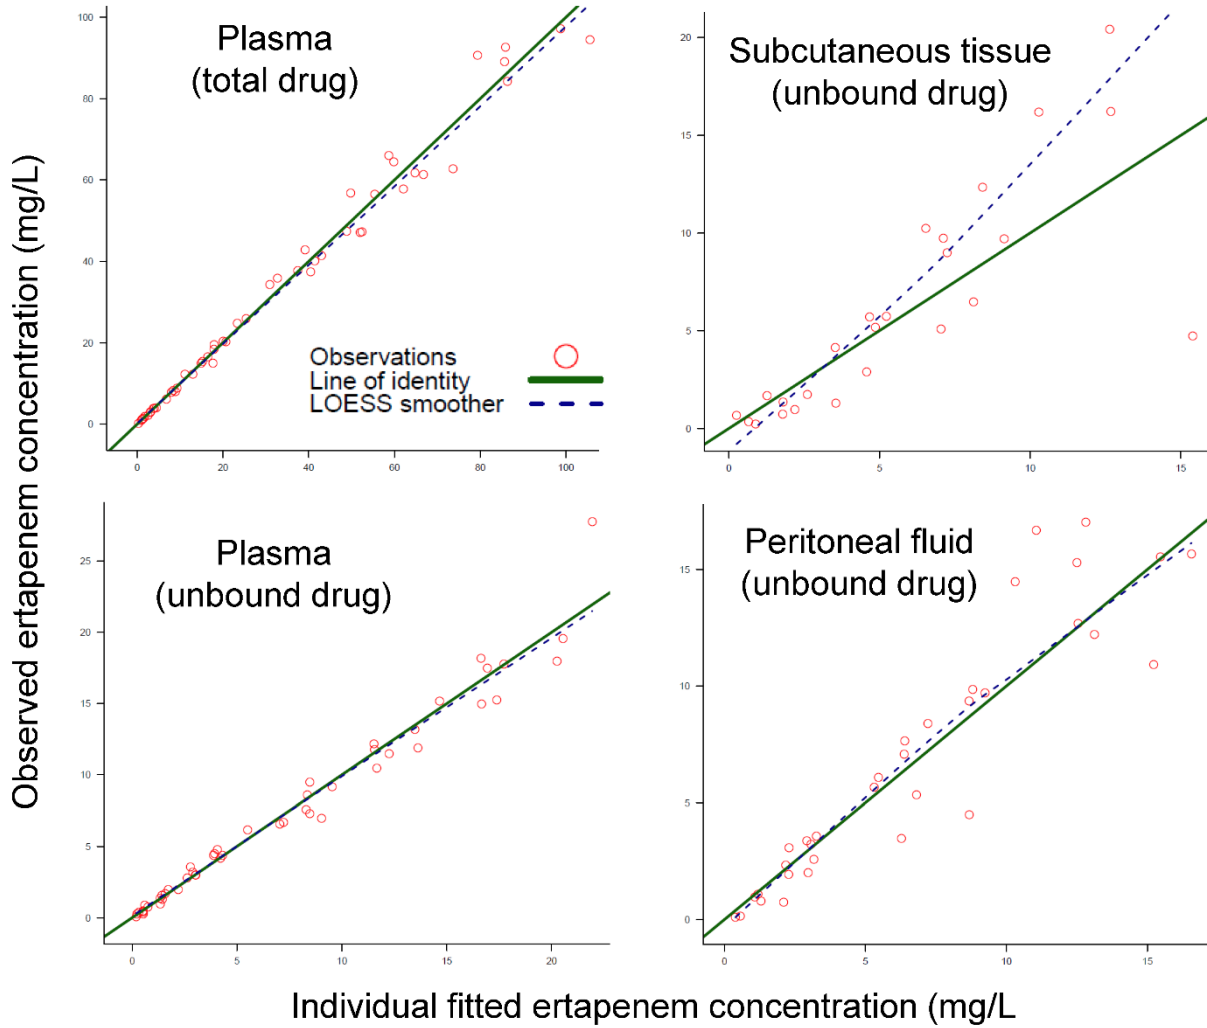

21

22

23 **Figure S3:** Observed vs. population fitted ertapenem concentrations in plasma  
24 (unbound and total drug), and unbound ertapenem in subcutaneous tissue  
25 and peritoneal fluid. The green line represents the line of identity and the  
26 dashed blue line a LOESS smoother through the observations.  
27

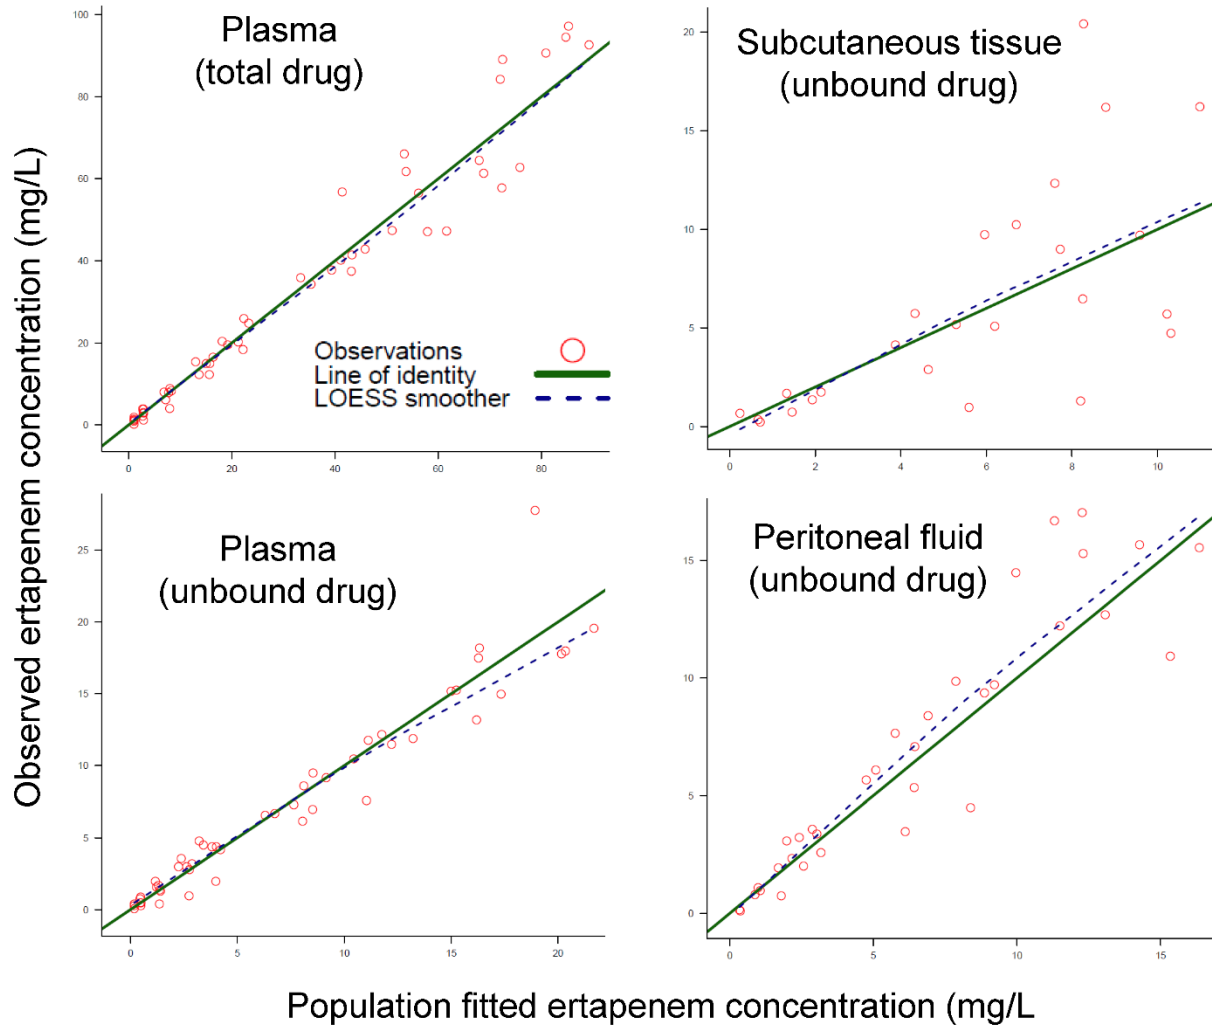

28

29
